# Supplementary material
Source: PubMed Central journal article supplement (PMC4073799)
Supplement: NIHMS585173-supplement-01.pdf [file NIHMS585173-supplement-01.pdf]

Immunity, Volume 40

Supplemental Information

**Downmodulation of Tumor Suppressor p53  
by T Cell Receptor Signaling Is Critical  
for Antigen-Specific CD4<sup>+</sup> T Cell Responses**

Masashi Watanabe, Kyung duk Moon, Melanie S. Vacchio, Karen S. Hathcock, and  
Richard J. Hodes

Inventory of Supplemental Information

Main Text Figure 1 is supported by Supplemental Figure 1.

Main Text Figure 7 is supported by Supplemental Figure 2.

Figure S1

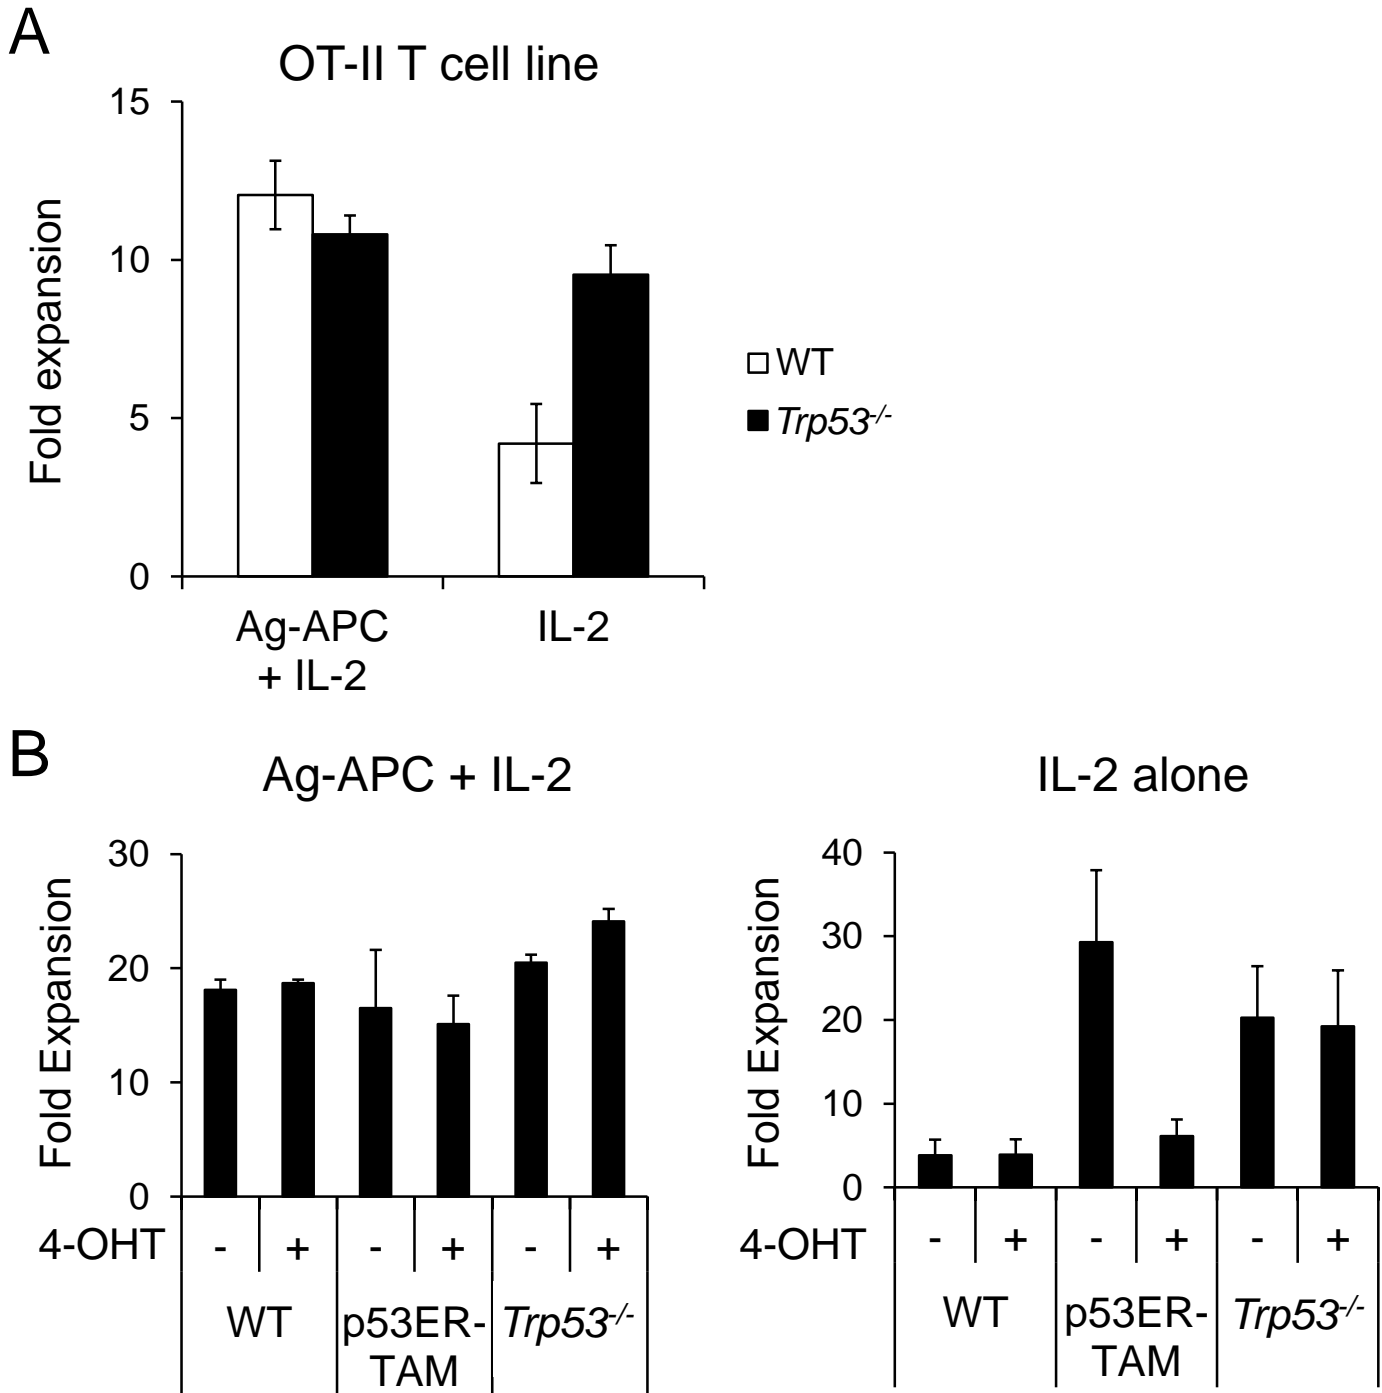

**Figure S1, related to Figure 1.** (A) Proliferation of OT-II cell line in response to Ag-APC+IL-2 or IL-2 stimulation. OT-II cell lines were established by repeated OVA<sub>323-339</sub>-APC + IL-2 stimulation *in vitro*. Fold expansion is shown for WT and *Trp53*<sup>-/-</sup> OTII cells upon stimulation with OVA<sub>323-339</sub>-APC + L-2 or IL-2 alone. The data shown are mean  $\pm$  SEM of pool data of four independent experiments. (B) Specificity of 4-hydroxy tamoxifen (4-OHT) suppression of proliferation of p53ER-TAM clones in response to IL-2 stimulation. KLH-specific p53ER-TAM (7 clones), WT (3 clones) and *Trp53*<sup>-/-</sup> clones (3 clones) were stimulated with Ag-APC + IL-2 or IL-2 alone with/without 4-OHT. Fold expansion was calculated at day 10. Mean  $\pm$  SME are shown. The data are representative of three independent experiments.

Figure S2

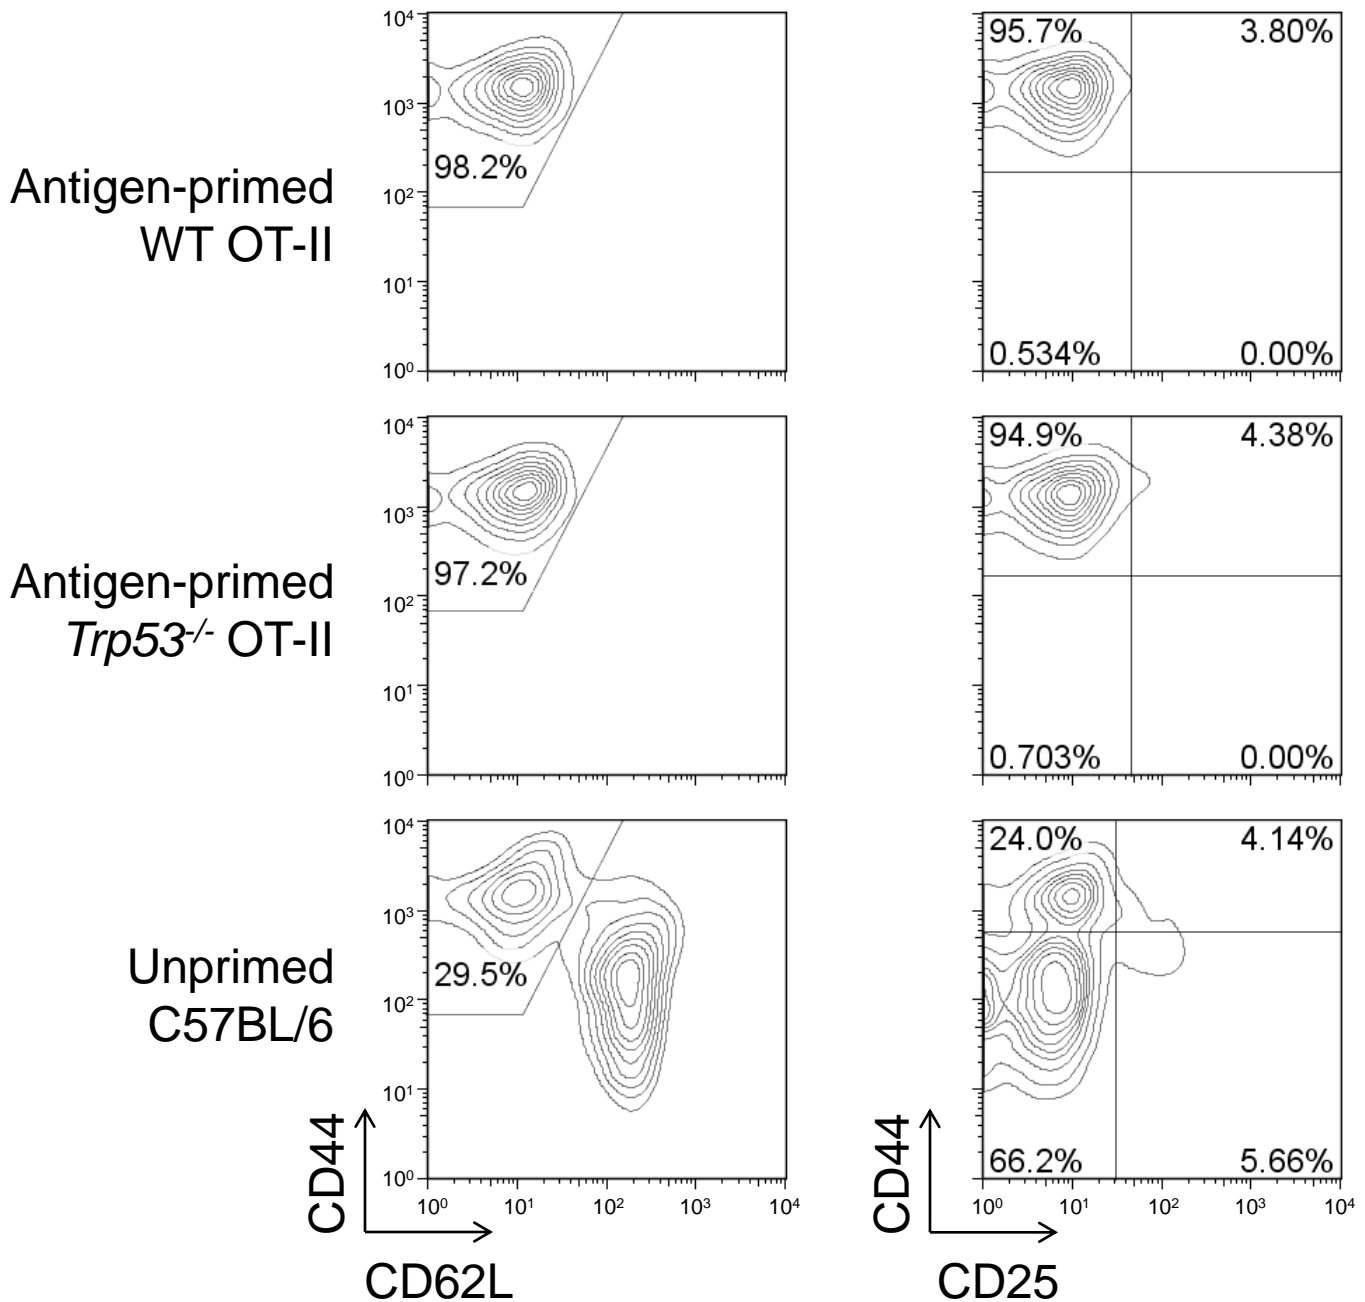

**Figure S2, related to Figure 7.** Phenotype analysis of *in vivo* antigen-primed OT-II cells. WT or *Trp53*<sup>-/-</sup> OT-II CD4<sup>+</sup> cells were transferred to *Rag1*<sup>-/-</sup> host mice followed by NP-OVA-Alum immunization. Three to four weeks later, splenic CD4<sup>+</sup> V $\alpha$ 2<sup>+</sup> V $\beta$ 5<sup>+</sup> cells were analyzed for expression of CD44, CD62L and CD25. Splenic CD4<sup>+</sup> population of unimmunized C57BL/6 mice was used as a staining control. The data shown are representative of three independent experiments (Total WT; n= 10 mice, *Trp53*<sup>-/-</sup>; n= 5 mice were individually analyzed).
